# Supplementary material for: Body size and temperature effects on standard metabolic rate for determining metabolic scope for activity of the polychaete Hediste (Nereis) diversicolor
Source: PeerJ. 2018 Oct 29;6:e5675. doi: 10.7717/peerj.5675 (PMC6211263; doi:10.7717/peerj.5675)
Supplement: Supplemental Information 1 — Oxygen consumption and biometric measurements. [file peerj-06-5675-s001.xlsx]

## Sheet: Feuil1
Temp code	WW (g)	DW (g)	L3 (mm)	TL (mm)	NSEG	VO2 (µmol h-1)
T1	0.1028	0.0148	2.214	37.9744	62	0.248122
T1	0.0278	0.0044	1.776	14.6354	26
T1	0.0411	0.0061	1.75	28.1224	45	0.238895
T1	0.1975	0.0262	2.568	50.0776	56	0.108001
T1	0.1501	0.0248	2.462	42.4642	52	0.302966
T1	0.25	0.0426	3.031	47.9396	63	0.673057
T1	0.5715	0.0834	3.093	59.5366	72	0.749785
T1	0.3196	0.0479	2.953	55.963	63	0.35608
T1	0.4018	0.0604	3.109	55.3222	69	0.810634
T1	0.052	0.0087	1.973	27.7322	36	0.249762
T1	0.1143	0.0166	2.117	39.685		0.256761
T1	0.1715	0.0295	2.735			0.264341
T1	0.2231	0.0309	2.924	53.7316	71	0.384433
T1	0.1969	0.0317	2.731	45.4182	71	0.578708
T1	0.2552	0.0381	2.927	48.1105	47	0.298521
T1	0.5484	0.0944	3.638	84.7512	83	0.96701
T1	0.472	0.0743	2.846	83.9762	58	0.855387
T1	0.3066	0.0433	3.077	53.1506	70	0.432993
T1	0.1038	0.0143	2.113	43.8966	65	0.192968
T1	0.0992	0.0152	2.033	37.8198	60	0.140605
T1	0.0921	0.0123	2.238	40.5324	56	0.340255
T1	0.2455	0.0272	2.845	47.5833	61	0.334961
T1	0.3409	0.0493	2.696	52.6094	52	0.48826
T1	0.2594	0.0402	2.68	65.1284	69	0.691326
T1	0.4244	0.0632	3.182	67.8948	70	0.661328
T1	0.3599	0.0498	2.861	51.3957	63	0.644903
T1	0.3734	0.0559	2.925	66.1037	72	0.802264
T2	0.0702	0.01	1.881	26.98	43	0.187724
T2	0.0543	0.0069	1.752	32.16	51	0.0874917
T2	0.1227	0.018	2.485	42.6326	65	0.365801
T2	0.1839	0.0258	2.775	45.5767	59	0.406813
T2	0.202	0.0254	2.798	47.1486	66	0.391642
T2	0.3208	0.0463	2.928	43.1852	64	0.525591
T2	0.2992	0.0438	2.87	46.7353	52	1.09392
T2	0.2673	0.0408	3.045	64.5812	59	0.640869
T2	0.3833	0.0575	3.185	48.3112	57	1.88151
T2	0.1208	0.0167	2.284	45.3936	54	0.464856
T2	0.1007	0.0154	2.218	31.0352	46	0.263115
T2	0.0583	0.0082	1.874	22.477	34
T2	0.3216	0.0522	2.955	71.5108	82	0.803559
T2	0.2778	0.0489	2.815	52.4128	55	1.20332
T2	0.201	0.0323	2.644	58.0228	68	0.923377
T2	0.2524	0.0353	3.062	48.6556	51	0.763656
T2	0.4394	0.0666	3.484	60.2616	44	1.65248
T2	0.4111	0.0635	3.118	59.7707	53	1.51566
T2	0.0622	0.0092	2.072	33.6218	43	0.176102
T2	0.0506	0.007	1.761	23.1993	41	0.259554
T2	0.0576	0.0076	1.944	24.8562	37	0.194614
T2	0.1549	0.0218	2.437	40.4806	57	0.422153
T2	0.1825	0.0262	2.49	45.9124	53	0.498682
T2	0.3041	0.0375	2.851	65.384	66	1.17582
T2	0.3099	0.0423	2.875	59.2853	55	0.711171
T2	0.3303	0.0436	3.219	72.272	53	0.87829
T2	0.3536	0.0527	2.958	51.9067	48	0.726725
T3	0.0414	0.0066	2.007	20.2562	27	0.107299
T3	0.0684	0.0096	2.136	31.8112	53	0.383166
T3	0.0983	0.0144	2.306	35.0558	45	0.404254
T3	0.146	0.0236	2.538	38.1434	39	0.75911
T3	0.2463	0.031	2.86	43.6023	65	0.887672
T3	0.1832	0.0319	2.665	46.7704	53	0.76658
T3	0.3198	0.0386	3.293	58.3143	52	0.999599
T3	0.4064	0.0559	3.196	75.889	75	1.14171
T3	0.2128	0.0335	2.918	40.797	44	0.850746
T3	0.2016	0.0345	2.47	52.285	75	1.14442
T3	0.1164	0.0185	2.22	36.2782	54	0.372428
T3	0.0675	0.0109	2.15	27.3236	45	0.234623
T3	0.2599	0.04	2.53	57.7293	83	0.962705
T3	0.184	0.0315	3.131	38.9292	43	0.970479
T3	0.229	0.0321	2.471	52.5764	70	0.609376
T3	0.2762	0.0376	2.821	55.1652	48	0.972453
T3	0.3408	0.0539	2.906	42.6718	65	1.15758
T3	0.4865	0.065	3.293	53.1734	56	2.04204
T3	0.0765	0.0114	2.113	38.193	52	0.340198
T3	0.0437	0.0062	1.77	28.182	48	0.229622
T3	0.0894	0.0134	2.288	36.7456	49	0.447706
T3	0.2161	0.0344	2.848	46.8674	45	0.780595
T3	0.2782	0.0426	2.767	57.2455	60	1.14632
T3	0.1371	0.0185	2.591	40.4482	51	0.517834
T3	0.3008	0.0352	3.038	45.7915	55	0.966802
T3	0.4125	0.0634	3.4	77.1064	62	1.53431
T3	0.4124	0.0624	3.265	59.0043	49	1.45844
T4	0.0763	0.0118	2.318	25.2822	29	0.909855
T4	0.0332	0.0055	1.727	19.8624	33	0.441032
T4	0.0853	0.0148	2.338	34.7166	41	0.823152
T4	0.2111	0.0331	3.073	46.4382	54	1.60345
T4	0.154	0.0225	2.738	46.1952	58	1.08141
T4	0.2055	0.03	2.796	45.777	49	1.07253
T4	0.3051	0.0446	2.755	67.9012	64	1.90187
T4	0.3546	0.0545	2.831	64.6068	70	1.69541
T4	0.3683	0.0559	2.931	63.3078	53	2.02621
T4	0.0602	0.0079	2.059	29.3822	37	0.404277
T4	0.1823	0.0268	2.545	57.036	66	1.35946
T4	0.0951	0.0157	1.969	44.6158	49	0.70759
T4	0.2815	0.0437	2.704	43.5208	41	1.50076
T4	0.1715	0.0263	2.503	54.959	60	1.02612
T4	0.1805	0.0244	2.727	36.9852	34	0.669725
T4	0.2935	0.0429	2.937	71.3368	84	2.34712
T4	0.3355	0.0524	2.918	65.5408	72	1.50558
T4	0.3632	0.0534	2.857	54.0218	67	1.13524
T4	0.0636	0.0096	2.112	25.6887	46	0.415372
T4	0.1076	0.019	2.394	38.325	49	0.998427
T4	0.0238	0.0035	1.399	15.367	23	0.212284
T4	0.1291	0.0177	2.339	49.469	53	0.680864
T4	0.1794	0.0251	2.564	45.7078	61	1.15563
T4	0.1741	0.0229	2.627	42.1354	43	0.740315
T4	0.34	0.0301	2.739	58.5452	73	1.65446
T4	0.1983	0.0376	2.799	42.999	69	1.80475
T4	0.2748	0.0344	3.037	60.5487	66	1.15316
